# Supplementary material for: Aqueous supercapacitors based on carbonized silk electrodes
Source: Royal Society of Chemistry journal article supplement (doi:10.1039/c8ra01988f), 2018-01-01
Supplement: c8ra01988f1.pdf [file c8ra01988f1.pdf]

## Supplementary Information

### Aqueous Supercapacitors Based on Carbonized Silk Electrodes

Limei Zhang,<sup>a</sup> Zhaohui Meng,<sup>a</sup> Wen Yan,<sup>a</sup> Naibo Lin,<sup>\*a</sup>

and Xiang Yang Liu<sup>\*ab</sup>

<sup>a</sup> *Research Institution for Biomimetics and Soft Matter, Fujian Key Provincial Laboratory for Soft Functional Materials Research, College of Physical Science and Technology & College of Materials, Xiamen University, 422 Siming Nan Road, Xiamen 361005, P. R. China.*

<sup>b</sup> *Department of Physics, National University of Singapore, 2 Science Drive 3, Singapore 117542, Singapore.*

#### Corresponding Author

\*Tel.: +86 5922182775. Fax: +86 5922182775.

To whom correspondence should be addressed:

(N. Lin) [linnaibo@xmu.edu.cn](mailto:linnaibo@xmu.edu.cn)

(X. Y. Liu) [phyliuxy@nus.edu.sg](mailto:phyliuxy@nus.edu.sg)

#### Notes

The authors declare no competing financial interest.

**Calculations for the specific energy density ( $E_{cell}$ ) and specific power density ( $P_{cell}$ ) for symmetrical supercapacitors**

The specific energy density ( $E_{cell}$ ) and specific power density ( $P_{cell}$ ) for symmetrical supercapacitors were also calculated by using eqs 1 and 2:

$$E_{cell} = \frac{C_g \Delta V^2}{8 \times 3.6} \quad (1) \quad P_{cell} = \frac{E_{cell}}{t} \quad (2)$$

where  $\Delta V$  (V) = cell voltage after ohmic drop and  $t$  (h) = discharge time.

The specific capacitance ( $C_g$ ) for a single electrode was calculated by using eq 3:

$$C_g = \frac{2I}{(dV/dt)m} \quad (3)$$

where  $I$  = discharge current,  $dV/dt$  = slope measured through the discharge curve after ohmic drop, and  $m$  (g) = active material mass for a single electrode.

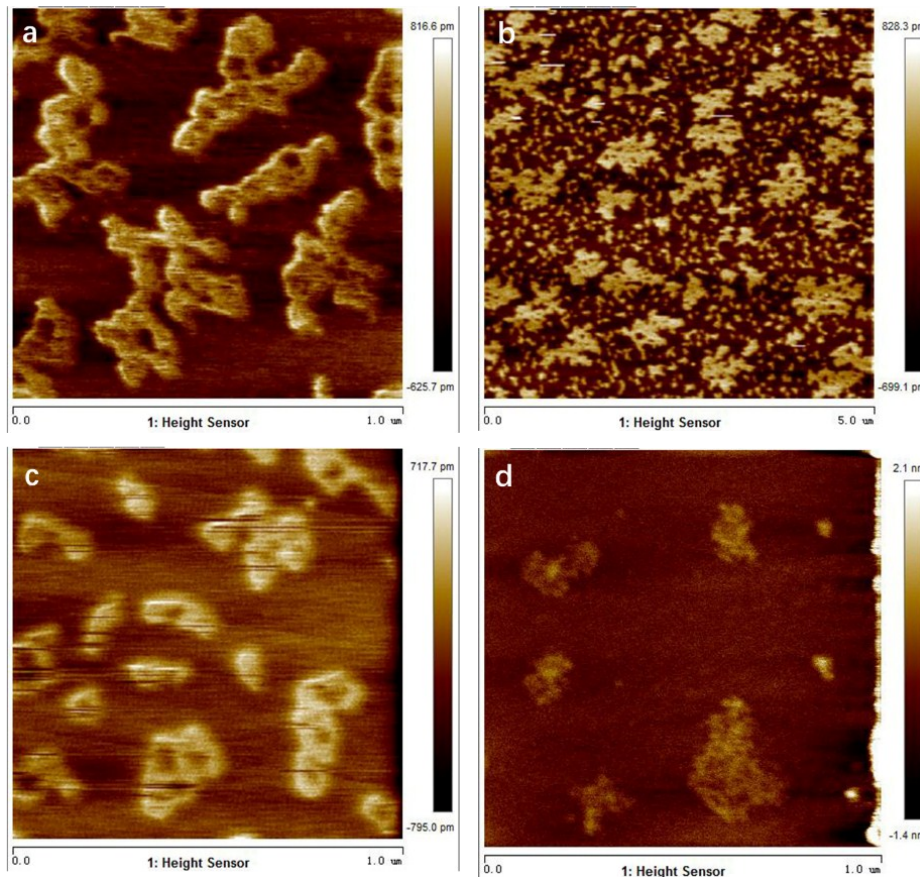

**Figure S1** AFM images of (a) SC-700; (b) SC-750; (c) SC-850;(d) SC-900.

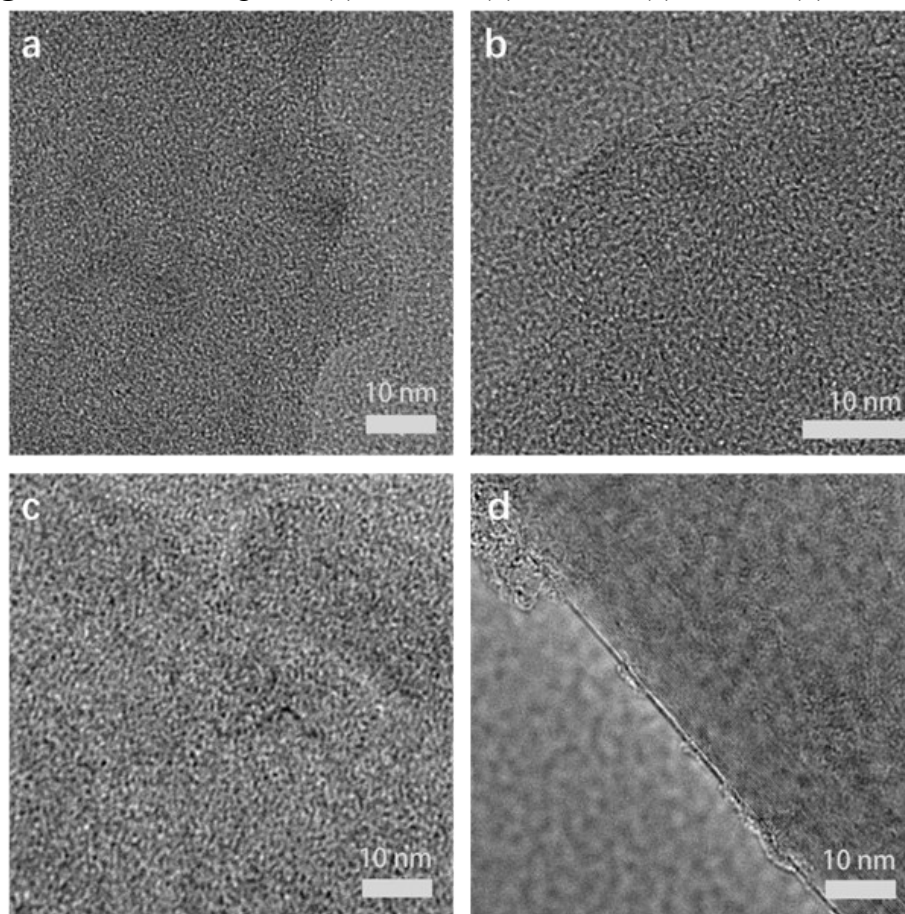

**Figure S2** High-magnification TEM images of (a, b) SC-850; (c, d) SC-900.

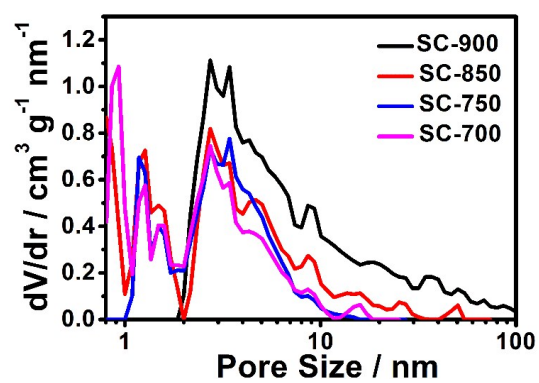

**Figure S3** Pore size distribution (PSD) of SCs at different activation temperatures.

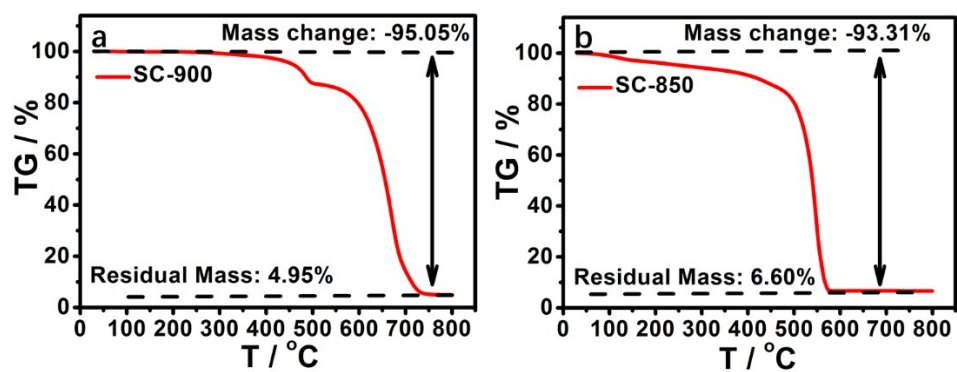

**Figure S4** Thermogravimetric Analysis (TG) of SCs at different activation temperatures.

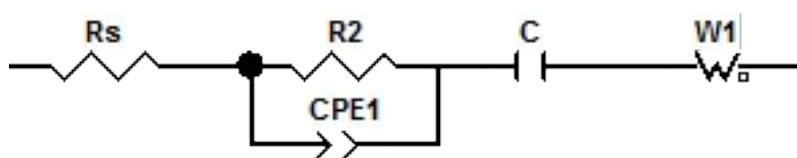

**Figure S5** EIS fitting model of SCs.
